# Supplementary material for: Assessing Sustainable Development of Deep Aquifers
Source: Springer Nature journal article supplement (doi:10.1007/s11269-023-03529-6), 2023-05-16
Supplement: MOESM1 [file 25370708]

[Click here to view linked References](#)

# Assessing sustainable development of deep aquifers – Supplementary Information

Annette Dietmaier<sup>1</sup> and Thomas Baumann<sup>1\*</sup>

1  
2  
3  
4  
5

<sup>1</sup>\*TUM School of Engineering and Design, Chair of Geohydrology, Technical University Munich, Arcisstr. 21, Munich, 80333, Bavaria, Germany.

\*Corresponding author(s). E-mail(s): [tbaumann@tum.de](mailto:tbaumann@tum.de); Contributing authors: [annette.dietmaier@tum.de](mailto:annette.dietmaier@tum.de);

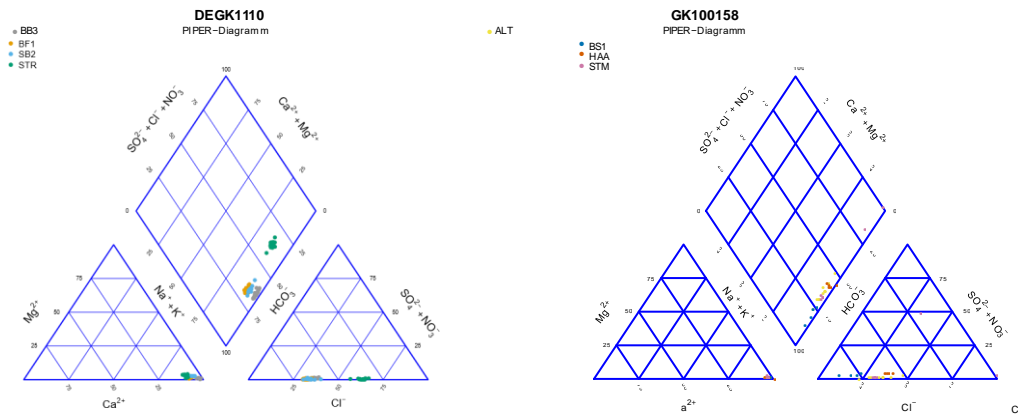

**Fig. 1** Piper diagrams showing general hydrochemical composition of the assessed groundwater samples. Top graph shows wells in the GK100158 while those within DEGK1110 are displayed in the bottom graph.

**Table 1** Result of mean and RSD values for TDS and each parameter when individual ions (Cl<sup>-</sup>, HCO<sub>3</sub><sup>-</sup> and Na<sup>+</sup>) were left out in the clustering process in BF1. The top values are recalculated by Diana, the bottom values are recalculated by kmeans.

|                               | All data                                        | w/o Cl <sup>-</sup> | w/o HCO <sub>3</sub> <sup>-</sup> | w/o Na <sup>+</sup> |
|-------------------------------|-------------------------------------------------|---------------------|-----------------------------------|---------------------|
|                               | Mean RSD                                        | Mean RSD            | Mean RSD                          | Mean RSD            |
|                               | /mg/L/%                                         | /mg/L/%             | /mg/L/%                           | /mg/L/%             |
| Na <sup>+</sup>               | Diana 295.650.03295.650.03301.260.02297.870.03  |                     |                                   |                     |
|                               | kmeans 295.650.03296.310.03308.010.02297.870.03 |                     |                                   |                     |
| K <sup>+</sup>                | 19.840.2119.840.2117.750.1319.310.19            |                     |                                   |                     |
|                               | 19.840.2119.740.2017.630.1319.310.19            |                     |                                   |                     |
| Ca <sup>2+</sup>              | 21.110.1521.110.1521.180.1320.890.14            |                     |                                   |                     |
|                               | 21.110.1521.200.1420.870.1020.890.14            |                     |                                   |                     |
| Mg <sup>2+</sup>              | 3.520.303.520.303.870.253.670.26                |                     |                                   |                     |
|                               | 3.520.303.570.283.850.253.670.26                |                     |                                   |                     |
| F <sup>-</sup>                | 6.520.086.520.086.000.126.310.09                |                     |                                   |                     |
|                               | 6.520.086.480.085.680.186.310.09                |                     |                                   |                     |
| Cl <sup>-</sup>               | 162.570.04162.570.04166.390.04164.450.04        |                     |                                   |                     |
|                               | 162.570.04163.610.04167.130.04164.450.04        |                     |                                   |                     |
| SO <sub>4</sub> <sup>2-</sup> | 3.410.473.410.473.880.413.820.45                |                     |                                   |                     |
|                               | 3.410.473.520.444.390.313.820.45                |                     |                                   |                     |
| HCO <sub>3</sub> <sup>-</sup> | 593.470.01593.470.01606.850.02597.520.02        |                     |                                   |                     |
|                               | 593.470.01595.290.01615.960.02597.520.02        |                     |                                   |                     |
| sum                           | 1106.090.011106.090.011127.190.021113.840.02    |                     |                                   |                     |
|                               | 1106.090.011109.710.011143.530.011113.840.02    |                     |                                   |                     |

**Table 2** Result of mean and RSD values for TD Sandea ch parameter when individual ions (Cl<sup>-</sup> and HCO<sub>3</sub><sup>-</sup>) were left out in the clustering process in SB2. In contrast to BF1, the cluster structure did not change when excluding Na<sup>+</sup>, which is why the corresponding column is not shown in Table 2. The top values are calculated by Diana, the bottom values are recalculated by kmeans.

|                               | All data w/o Cl <sup>-</sup>          | w/o HCO <sub>3</sub> <sup>-</sup> |
|-------------------------------|---------------------------------------|-----------------------------------|
|                               | Mean RSD<br>/mg/L/%/mg/L/%/mg/L/%     | Mean RSD<br>)                     |
| Na <sup>+</sup>               | Diana 276.640.03277.500.04279.140.02  |                                   |
|                               | kmeans 276.640.03274.730.03281.200.02 |                                   |
| K <sup>+</sup>                | 15.920.0516.420.1315.800.04           |                                   |
|                               | 15.920.0515.900.0515.620.03           |                                   |
| Ca <sup>2+</sup>              | 12.800.1212.960.1313.000.11           |                                   |
|                               | 12.800.1212.510.1213.600.06           |                                   |
| Mg <sup>2+</sup>              | 4.380.024.420.034.380.02              |                                   |
|                               | 4.380.024.380.024.380.02              |                                   |
| F <sup>-</sup>                | 5.810.055.870.065.770.05              |                                   |
|                               | 5.810.055.800.055.720.05              |                                   |
| Cl <sup>-</sup>               | 157.930.05161.640.11158.930.05        |                                   |
|                               | 157.930.05156.820.05163.100.03        |                                   |
| SO <sub>4</sub> <sup>2-</sup> | 4.160.473.620.314.160.47              |                                   |
|                               | 4.160.473.770.324.130.54              |                                   |
| HCO <sub>3</sub> <sup>-</sup> | 547.150.02545.080.01544.770.03        |                                   |
|                               | 547.150.02542.750.01546.300.03        |                                   |
| sum                           | 1024.800.021027.520.031025.940.02     |                                   |
|                               | 1024.800.021016.650.011034.050.02     |                                   |

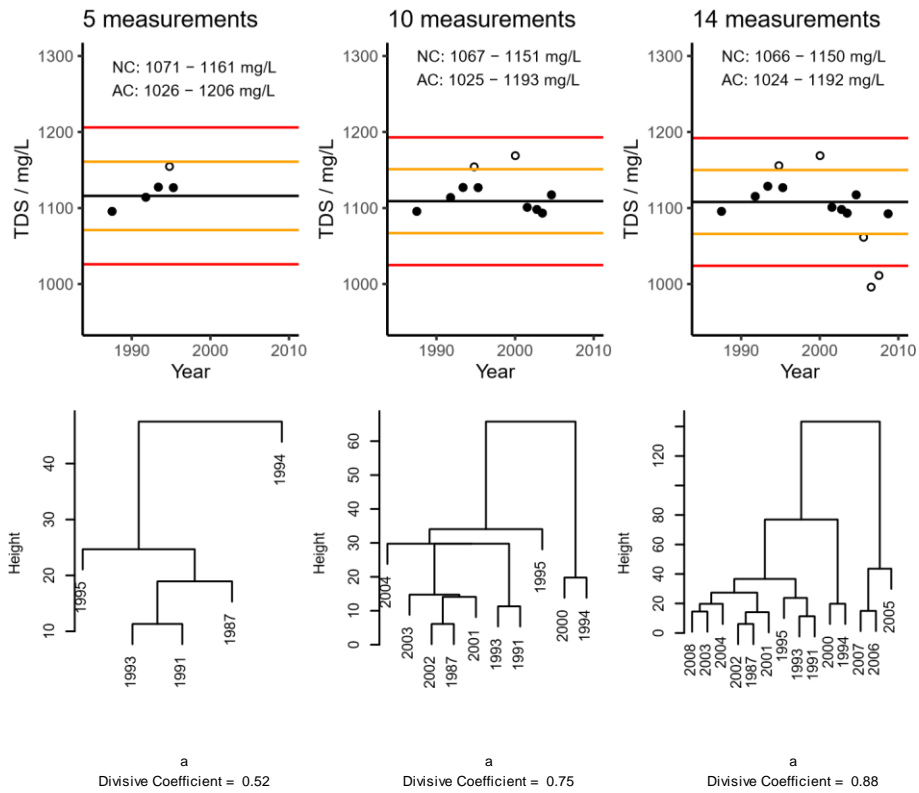

**Fig. 2** Development of corridors with growing data set based on the Diana algorithm. The solid black dots represent the data points that were included in the main cluster.

Differences to previous submission [Springer Nature 2021](#) [Click here to access/download;attachment template\\_o manuscript;WARM-D-22-00461-diff.pdf](#) <sup>L<sub>A</sub>T<sub>E</sub>X</sup>

[Click here to view linked References](#)
